# Supplementary material for: Estimates of genomic heritability and genome-wide association studies for blood parameters in Akkaraman sheep
Source: PubMed Central journal article supplement (PMC9630504; doi:10.1038/s41598-022-22966-8), 2022-11-02
Supplement: 41598_2022_22966_MOESM2_ESM.pdf [file 41598_2022_22966_MOESM2_ESM.pdf]

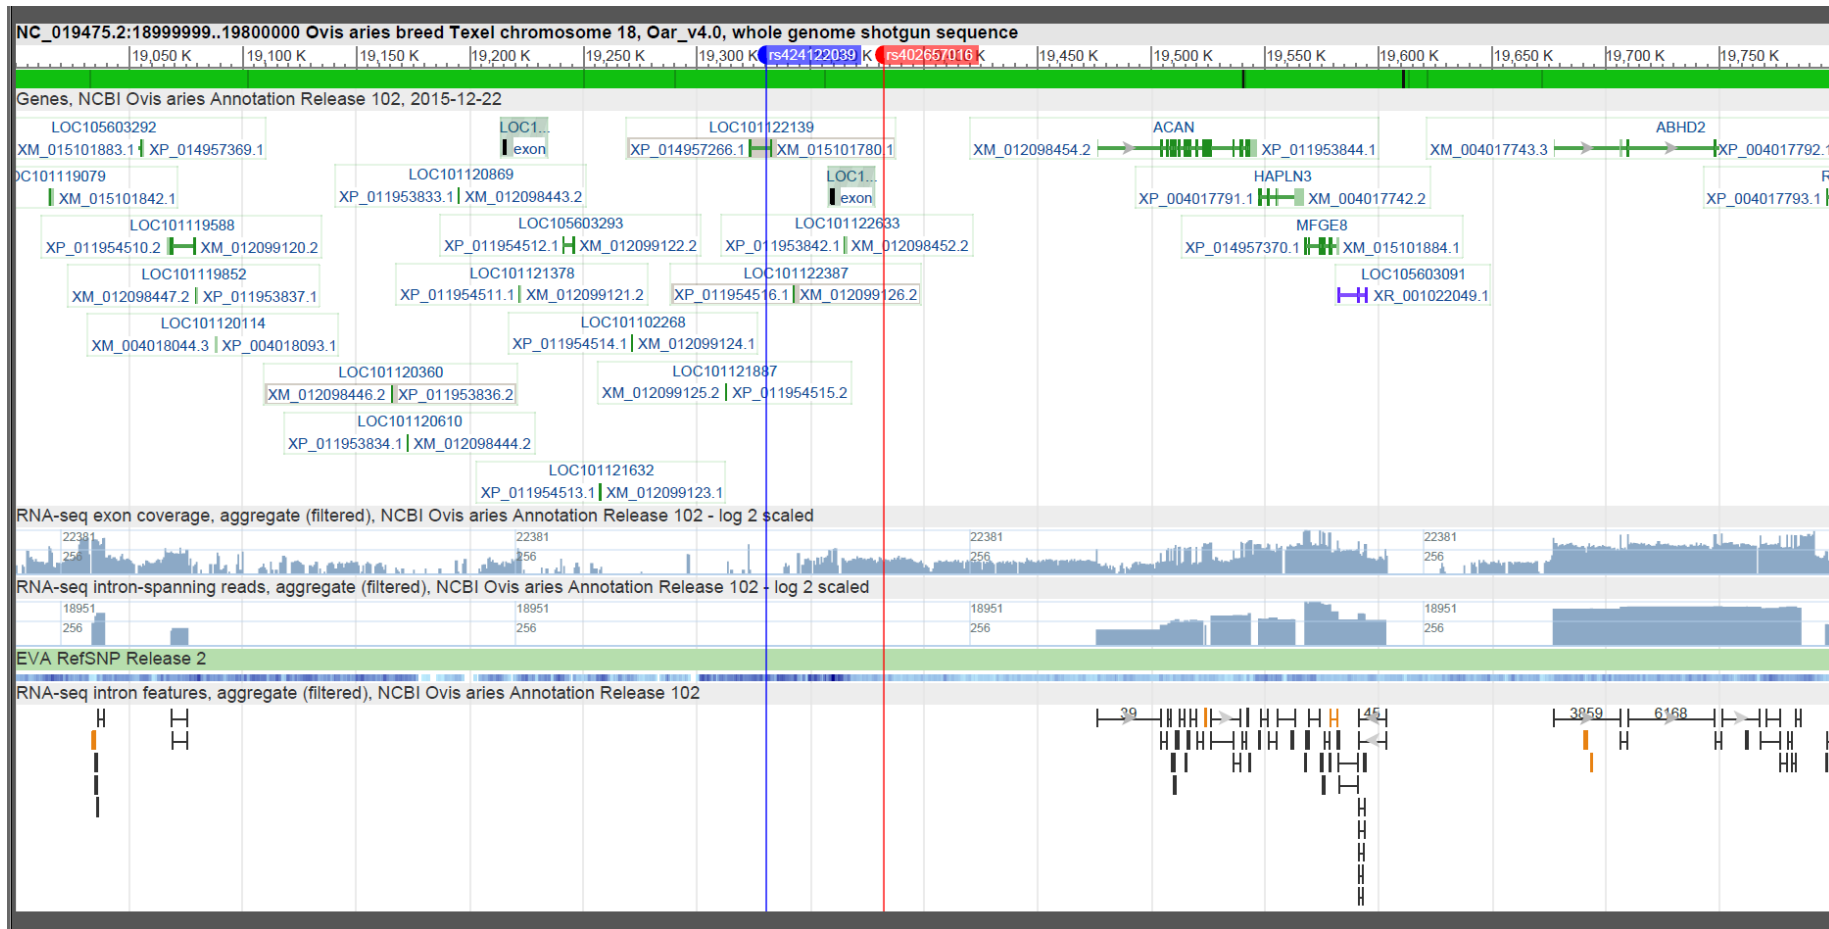

**Supplementary Figure 2.** ~800Kbp window on chromosome 18 including genes mainly populated by MYADM-like genes and significant SNPs.
