# Supplementary material for: Estimates of genomic heritability and genome-wide association studies for blood parameters in Akkaraman sheep
Source: PubMed Central journal article supplement (PMC9630504; doi:10.1038/s41598-022-22966-8), 2022-11-02
Supplement: 41598_2022_22966_MOESM4_ESM.pdf [file 41598_2022_22966_MOESM4_ESM.pdf]

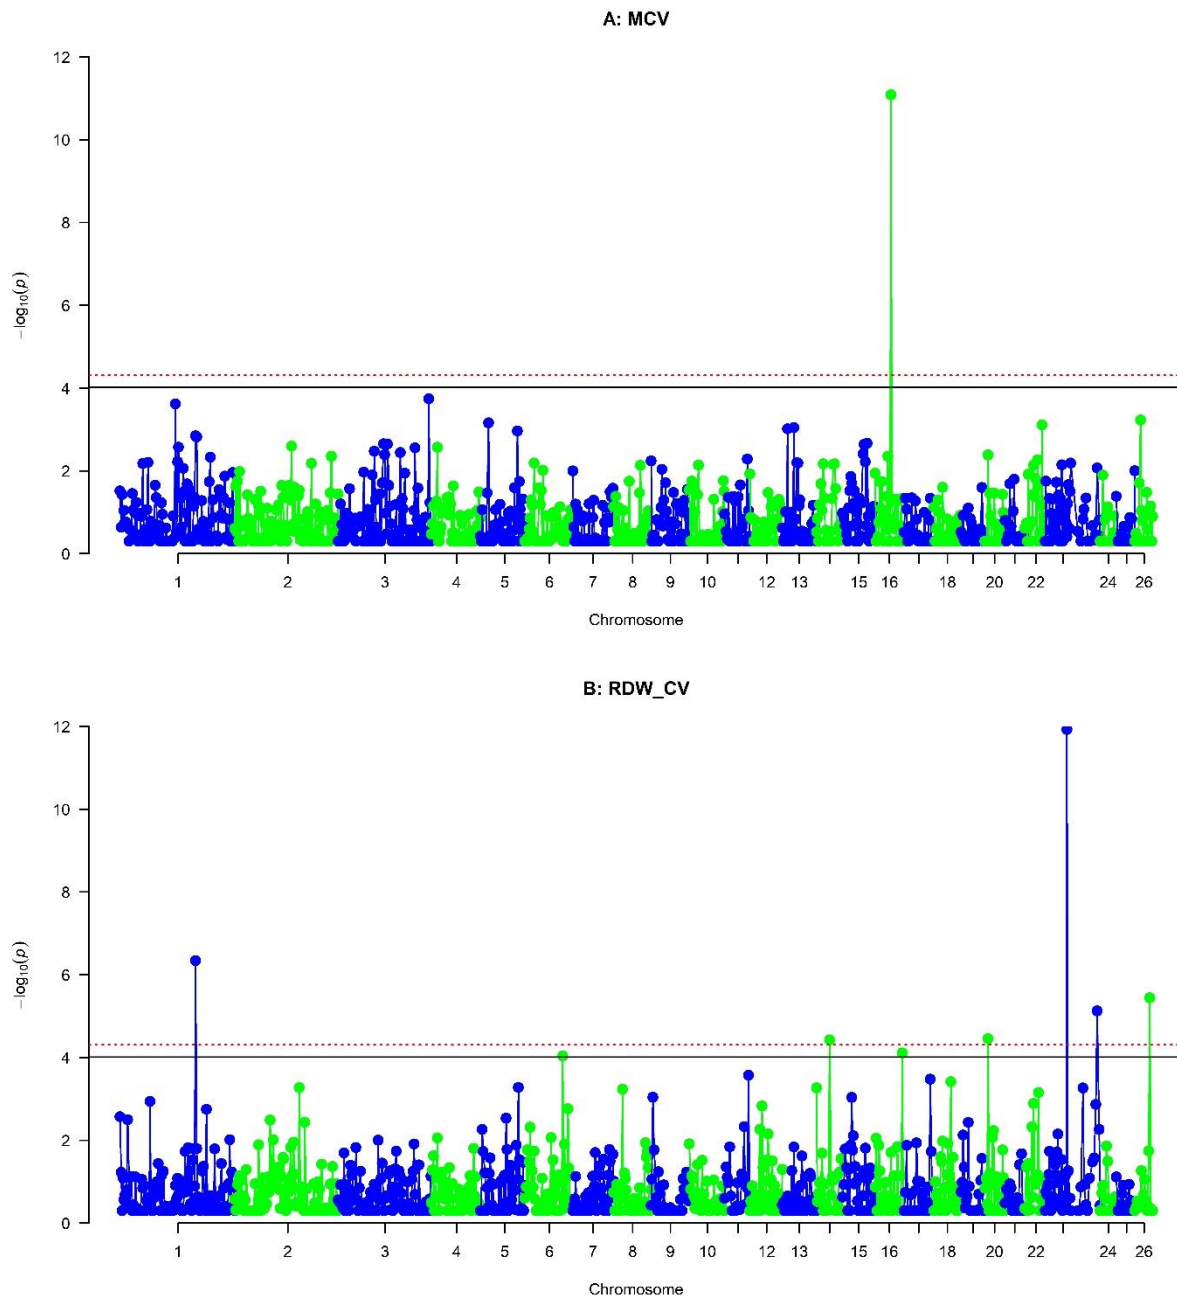

**Supplementary Figure 4.** Manhattan plots for associations between regions and mean corpuscular volume (MCV) and RBC volume distribution width coefficient of variation (RDW\_CV). Red dashed horizontal lines indicate suggestive (0.10) significance and black horizontal line indicate genome-wide (0.05) significance with 1,038 windows.
